# Supplementary material for: Silicon Dioxide Nanoparticles Induce Innate Immune Responses and Activate Antioxidant Machinery in Wheat Against Rhizoctonia solani
Source: MDPI journal article supplement (doi:10.3390/plants10122758), 2021-12-14
Supplement: s1 [file s1]

# Biosynthesized Silicon Dioxide Nanoparticles Mitigate Wheat Damping-Off, Caused by *Rhizoctonia solani*, via the Simultaneous Activation of a Multilayered Defense System

Abdelrazek S. Abdelrhim <sup>1</sup>, Yasser S. A. Mazrou <sup>2,3</sup>, Yasser Nehela <sup>4,5,\*</sup>, Osama O. Atallah <sup>6</sup>, Ranya M. El-Ashmony <sup>1</sup> and Mona F. A. Dawood <sup>7</sup>

<sup>1</sup> Department of Plant Pathology, Faculty of Agriculture, Minia University, El-Minya 61512, Egypt; Abdelrazek.sharawy@mu.edu.eg (A.S.A.); ranya.elashmoni@mu.edu.eg (R.M.E.-A.)

<sup>2</sup> Business Administration Department, Community college, King Khalid University, Guraiger, Abha 62529, Saudi Arabia; ymazrou@kku.edu.sa

<sup>3</sup> Department of Agriculture Economic, Faculty of Agriculture, Tanta University, Tanta 31527, Egypt; yasser.mazroua@agr.tanta.edu.eg

<sup>4</sup> Department of Agricultural Botany, Faculty of Agriculture, Tanta University, Tanta 31511, Egypt; yasser.nehela@ufl.edu

<sup>5</sup> Department of Plant Pathology, Citrus Research and Education Center, University of Florida, 700 Experiment Station Rd., Lake Alfred, FL 33850, USA

<sup>6</sup> Department of Plant Pathology, Zagazig University, Zagazig 44519, Egypt; osamaoatall1h@ufl.edu

<sup>7</sup> Botany and Microbiology Department, Faculty of Science, Assiut University, Assiut 71516, Egypt; mo\_fa87@aun.edu.eg

\* Correspondence: yasser.nehela@ufl.edu

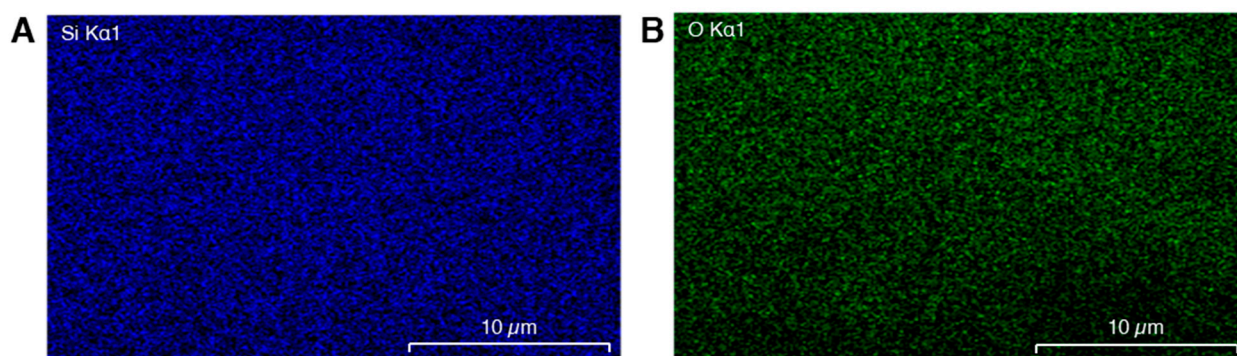

**Figure S1.** Energy-dispersive X-ray spectroscopy (EDS) elemental mapping of Si Ka1 (A) and O Ka1 (B).
